# Supplementary material
Source: Springer Nature journal article supplement (https://www.springermedizin.de/resource/supplementary/12891_2009_682_MOESM3_ESM.pdf/9506172)
Supplement: MOESM3 [file 9506172]

|                                                                        |                                                                                                  | Admission | 2 weeks after admission (discharge) | 10 weeks after admission (telephone interview) |
|------------------------------------------------------------------------|--------------------------------------------------------------------------------------------------|-----------|-------------------------------------|------------------------------------------------|
| <b>Assessment of joint/ physical functionality (secondary outcome)</b> | Range of motion of the affected joint (flexion und extension, possible average improvement)      | X (pq)    | X (pq)                              |                                                |
|                                                                        | Lequesne knee questionnaire                                                                      | X         | X                                   | X                                              |
|                                                                        | Timed up& go test                                                                                | X (pq)    | X (pq)                              |                                                |
|                                                                        |                                                                                                  |           |                                     |                                                |
| <b>Health-related quality of life (secondary outcome)</b>              | SF-36 (rough evaluation: physical summation scale, psychological summation scale)                | X         | X                                   | X                                              |
|                                                                        | AIMS2-SF                                                                                         | X         | X                                   | X                                              |
|                                                                        |                                                                                                  |           |                                     |                                                |
| <b>Assessment of pain (primary outcome)</b>                            | Visual analog scale                                                                              | X (pq)    | X (pq)                              |                                                |
|                                                                        | Measurement of daily pain intensity by <b>patient diary</b> (period from admission to discharge) | ↔         |                                     |                                                |
| <b>Health assessment (secondary outcome)</b>                           | EQ-5D                                                                                            | X         | X                                   | X                                              |
|                                                                        | Measurement of daily state of health by patient diary (period from admission to discharge)       | X         | X                                   | X                                              |
|                                                                        | Measurement of daily blood pressure by <b>patient diary</b> (period from admission to discharge) | ↔         |                                     |                                                |
